# Supplementary material for: Nitrogen oxides and ozone fluxes from an oilseed-rape management cycle: the influence of cattle slurry application
Source: Copernicus journal article supplement (doi:10.5194/bg-14-2225-2017), 2017-05-02
Supplement: Supplementary file 2 [file bg-14-2225-2017-supplement.zip]

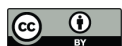

## *Supplement of*

# **Nitrogen oxides and ozone fluxes from an oilseed-rape management cycle: the influence of cattle slurry application**

**Raffaella M. Vuolo et al.**

*Correspondence to:* Benjamin Loubet ([benjamin.loubet@inra.fr](mailto:benjamin.loubet@inra.fr))

- [bg-14-2225-2017-supplement-title-page.pdf](#)
- [Data Description.csv](#)
- [Supplement.pdf](#)
- [Vuolo\\_et\\_al\\_2017.csv](#)

The copyright of individual parts of the supplement might differ from the CC-BY 3.0 licence.
